# Supplementary material for: Promoting uniform zinc coatings through the use of quaternary ammonium salts based on phthalimide as electroplating additives
Source: Royal Society of Chemistry journal article supplement (doi:10.1039/d4su00343h), 2024-01-01

# Supporting Information

## Promoting Uniform Zinc Coatings through the Use of Quaternary Ammonium Salts based on Phthalimide as Electroplating Additives

Kexin Du <sup>a</sup>, Xuyang Li <sup>a</sup>, Wenhao Zhou <sup>a</sup>, Peikun Zou <sup>a</sup>, Nayun Zhou <sup>a</sup>, Xin Chen <sup>a</sup> and Limin Wang <sup>\*a</sup>

<sup>a</sup> Shanghai Key Laboratory for Functional Materials Chemistry and Institute of Fine Chemicals, School of Chemistry and Molecular Engineering, East China University of Science and Technology, 130 Meilong Road, Shanghai 200237, P. R. China.

\*E-mail: [wanglimin@ecust.edu.cn](mailto:wanglimin@ecust.edu.cn);

## 1. $^1\text{H}$ NMR, $^{13}\text{C}$ NMR and mass spectral information of the compound

**Compound P11:** yield: 58%  $^1\text{H}$  NMR (400 MHz,  $\text{DMSO-}d_6$ )  $\delta$  9.12-9.04 (m, 2H), 8.61 (tt,  $J = 7.8$ , 1.4 Hz, 1H), 8.20-8.12 (m, 2H), 7.90 – 7.81 (m, 4H), 4.63 (t,  $J = 7.5$  Hz, 2H), 3.62 (t,  $J = 6.8$  Hz, 2H), 2.05 – 1.88 (m, 2H), 1.70 – 1.53 (m, 2H).  $^{13}\text{C}$  NMR (101 MHz,  $\text{DMSO-}d_6$ )  $\delta$  151.46, 145.82, 134.90, 125.90, 123.51, 122.38, 37.27.

**Fig. S1**  $^1\text{H}$  NMR ( $\text{DMSO-}d_6$ ) of the compound P11

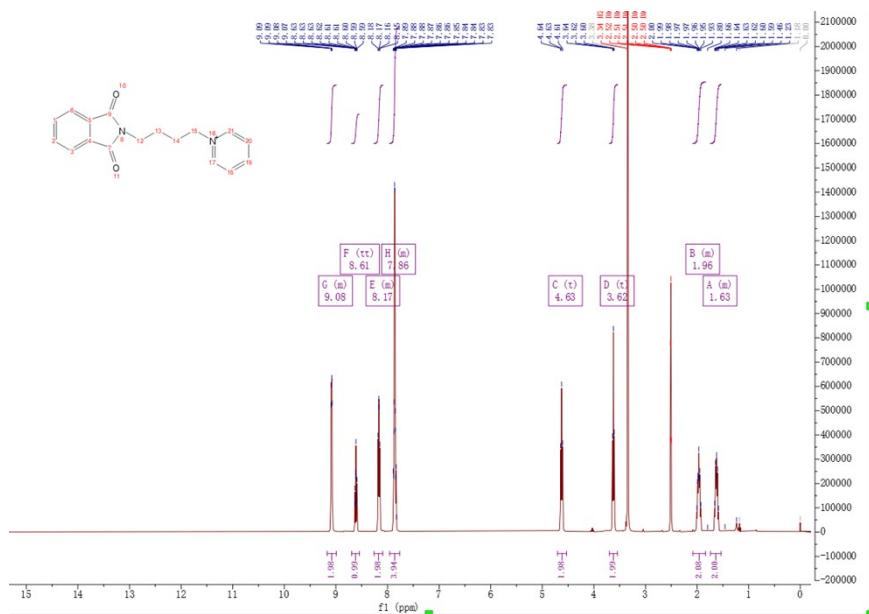

**Fig. S2**  $^{13}\text{C}$  NMR ( $\text{DMSO-}d_6$ ) of the compound P11

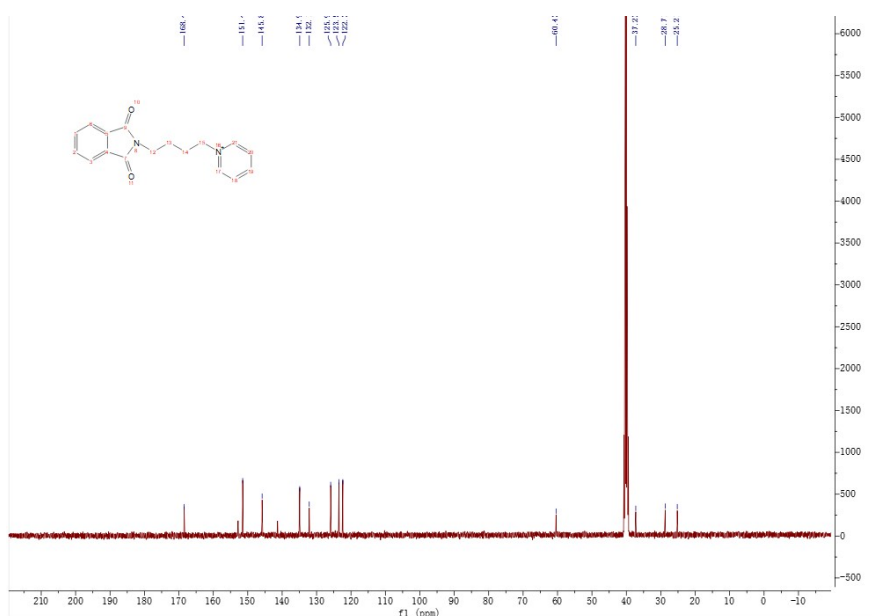

**Compound PI2:** yield: 62%  $^1\text{H}$  NMR (400 MHz,  $\text{DMSO-}d_6$ )  $\delta$  9.37 – 9.04 (m, 2H), 8.98 – 8.78 (m, 2H), 8.74 – 8.52 (m, 2H), 8.20 – 7.95 (m, 2H), 7.92 – 7.68 (m, 4H), 4.67 (t,  $J = 7.4$  Hz, 2H), 3.64 (t,  $J = 6.8$  Hz, 2H), 2.16 – 1.86 (m, 2H), 1.67 (p,  $J = 6.9$  Hz, 2H).  $^{13}\text{C}$  NMR (101 MHz,  $\text{DMSO-}d_6$ )  $\delta$  168.47, 152.79, 151.44, 145.80, 141.32, 134.88, 125.88, 123.49, 122.36, 60.41, 37.25, 28.69, 25.19.

**Fig. S3**  $^1\text{H}$  NMR ( $\text{DMSO-}d_6$ ) of the compound PI2

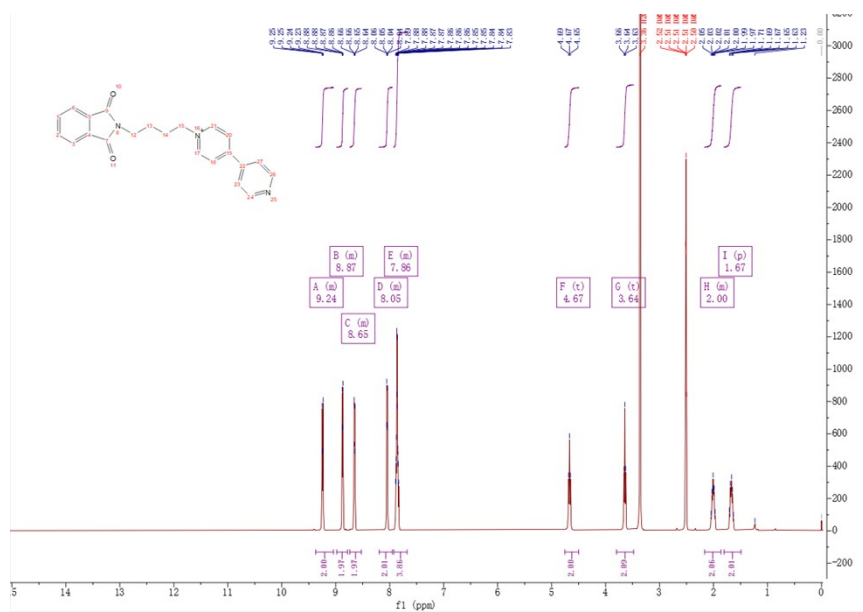

**Fig. S4**  $^{13}\text{C}$  NMR ( $\text{DMSO-}d_6$ ) of the compound PI2

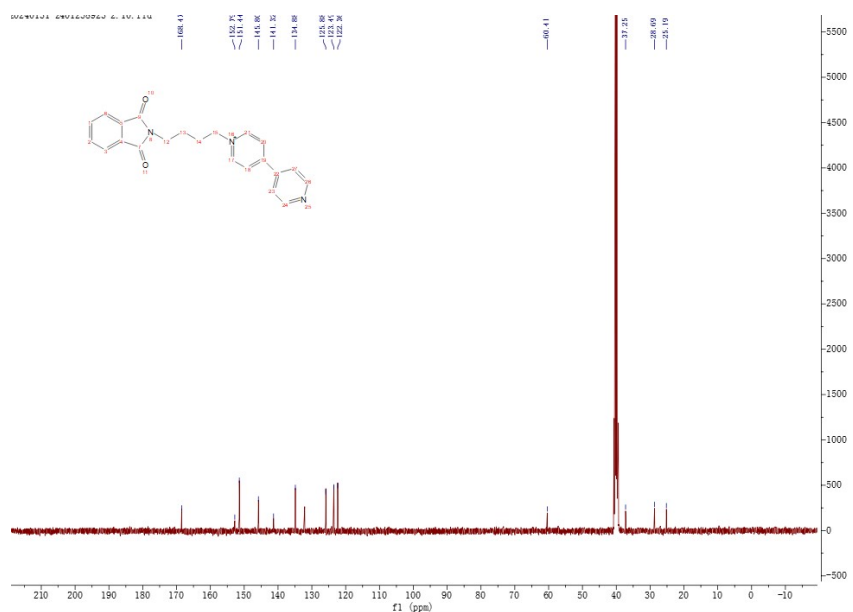

**Compound PI3:** yield: 57%  $^1\text{H}$  NMR (400 MHz,  $\text{DMSO-}d_6$ )  $\delta$  9.55 (dd,  $J = 5.8, 1.5$  Hz, 1H), 9.29 (d,  $J = 8.3$  Hz, 1H), 8.66 (d,  $J = 9.0$  Hz, 1H), 8.49 (dd,  $J = 8.3, 1.5$  Hz, 1H), 8.29 – 8.16 (m, 2H), 8.08 – 8.03 (m, 1H), 7.84 (qd,  $J = 4.5, 2.4$  Hz, 4H), 5.08 (t,  $J = 7.6$  Hz, 2H), 3.64 (t,  $J = 6.8$  Hz, 2H), 2.06 – 1.97 (m, 2H), 1.76 (p,  $J = 6.9$  Hz, 2H).  $^{13}\text{C}$  NMR (101 MHz,  $\text{DMSO-}d_6$ )  $\delta$  168.47, 150.23, 147.94, 136.11, 134.88, 132.09, 131.21, 130.35, 123.49, 122.64, 119.44, 57.38, 37.31, 27.43, 25.46.

**Fig. S5**  $^1\text{H}$  NMR ( $\text{DMSO-}d_6$ ) of the compound PI3

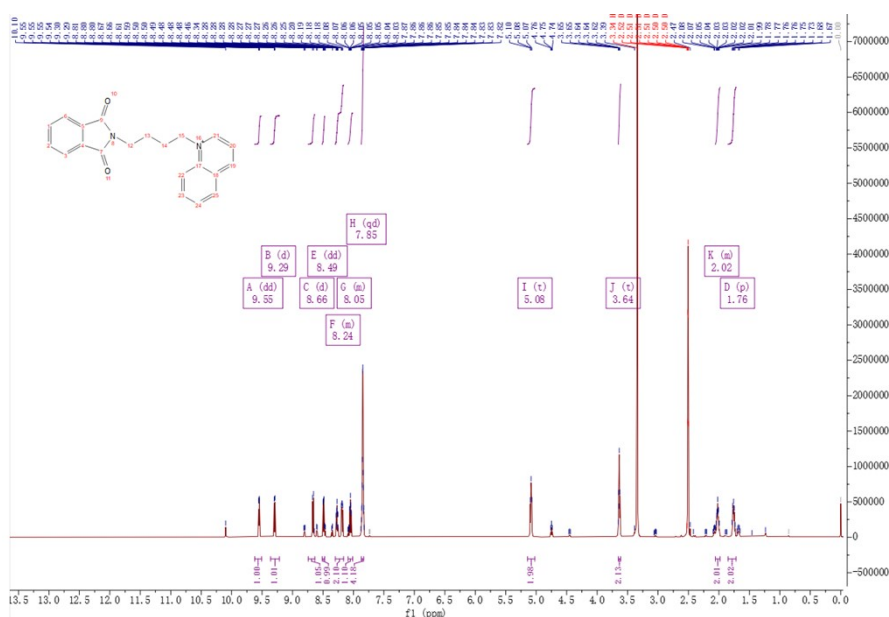

**Fig. S6**  $^{13}\text{C}$  NMR ( $\text{DMSO-}d_6$ ) of the compound PI3

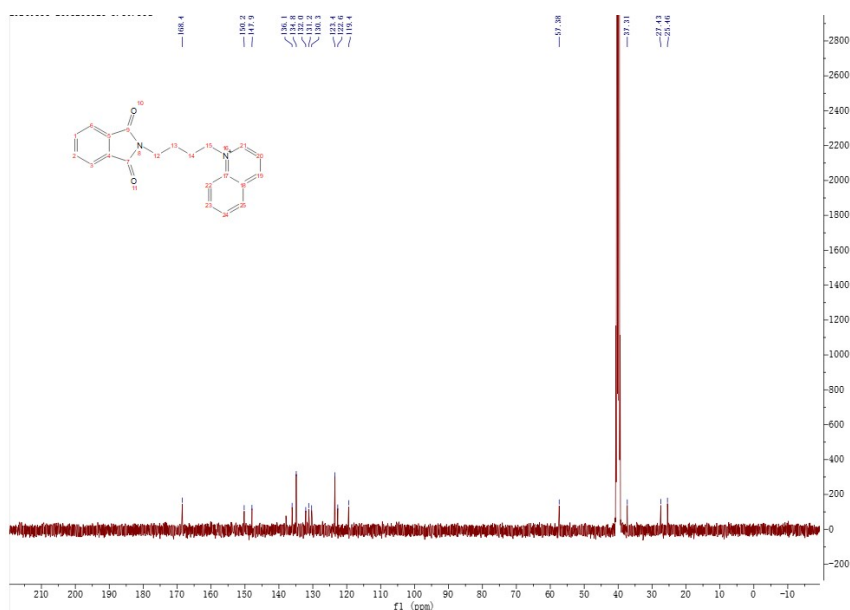

**Compound PI4:** yield: 55%  $^1\text{H}$  NMR (400 MHz,  $\text{DMSO-}d_6$ )  $\delta$  9.48-9.15 (m, 4H), 8.92-8.69 (m, 4H), 7.97-7.78 (m, 4H), 4.72 (t,  $J = 7.4$  Hz, 2H), 4.46 (s, 3H), 3.65 (t,  $J = 6.8$  Hz, 2H), 2.04 (td,  $J = 14.3, 6.7$  Hz, 2H), 1.82-1.56 (m, 2H).  $^{13}\text{C}$  NMR (101 MHz,  $\text{DMSO-}d_6$ )  $\delta$  168.50, 147.12, 146.28, 134.94, 132.14, 127.06, 126.57, 123.53, 60.95, 48.57, 37.26, 28.80, 25.24.

**Fig. S7**  $^1\text{H}$  NMR ( $\text{DMSO-}d_6$ ) of the compound PI4

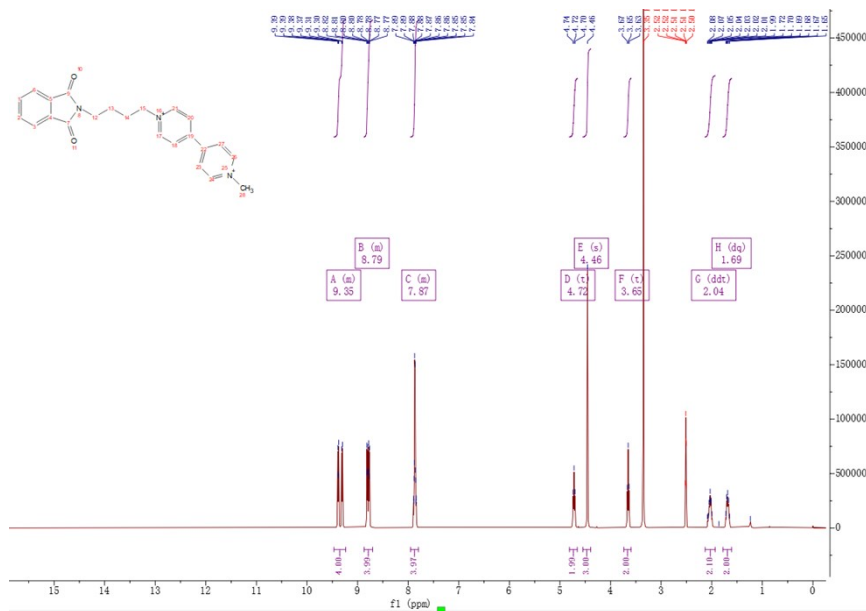

**Fig. S8**  $^{13}\text{C}$  NMR ( $\text{DMSO-}d_6$ ) of the compound PI4

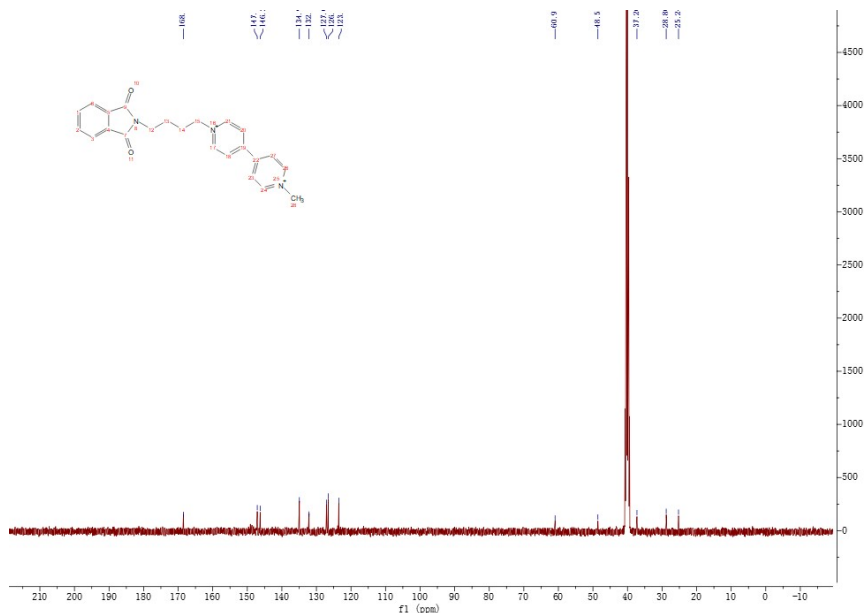

**Compound PI5:** yield: 52%  $^1\text{H}$  NMR (400 MHz,  $\text{DMSO-}d_6$ )  $\delta$  9.49-9.14 (m, 4H), 9.03-8.62 (m, 4H), 8.09-7.67 (m, 4H), 4.72 (t,  $J = 7.4$  Hz, 2H), 4.46 (s, 3H), 3.65 (t,  $J = 6.8$  Hz, 2H), 2.04 (td,  $J = 14.3, 6.7$  Hz, 2H), 1.82-1.56 (m, 2H).  $^{13}\text{C}$  NMR (101 MHz,  $\text{DMSO-}d_6$ )  $\delta$  168.50, 147.12, 146.28, 134.94, 132.14, 127.06, 126.57, 123.53, 60.95, 48.57, 37.26, 28.80, 25.24.

**Fig. S9**  $^1\text{H}$  NMR ( $\text{DMSO-}d_6$ ) of the compound PI5

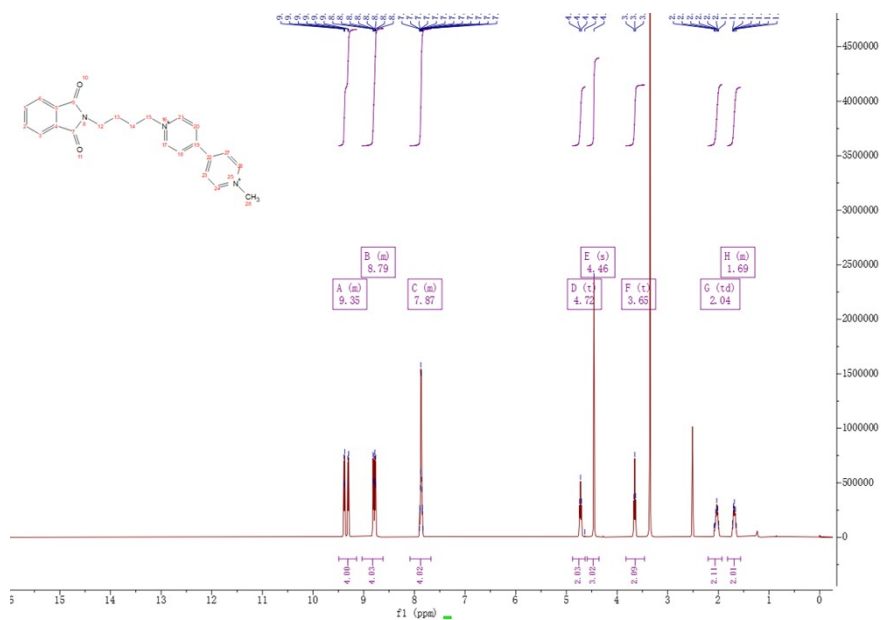

**Fig. S10**  $^{13}\text{C}$  NMR ( $\text{DMSO-}d_6$ ) of the compound PI5

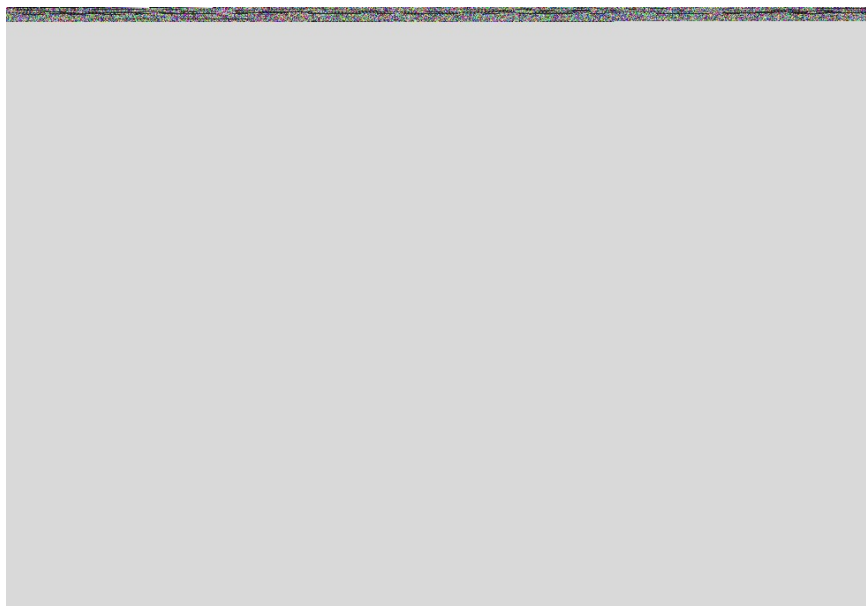

Supplement: d4su00343h1.pdf [file d4su00343h1.pdf]
